# Supplementary material for: An extremely highly electrophilic heteroaromatic structure: 4,6-dinitrotetrazolo[1,5-a]pyridineElectronic supplementary information (ESI) available: Fig. S1 Effect of pH on the ionization of the OH group of C-4a to give the diadduct D-4a in aqueous solution. See http://www.rsc.org/suppdata/ob/b3/b306437a/
Source: Royal Society of Chemistry journal article supplement (doi:10.1039/b306437a), 2003-01-01
Supplement: b306437a.doc [file b306437a.doc]

Supplementary data

Table of contents:

## Figure S1

Figure S1 : Effect of pH on the ionization of the OH group of C-4a to give the diadduct D-4a in aqueous solution, pK= 8.78. T = 25°C.
